# Supplementary material for: Regulation of (p)ppGpp hydrolysis by a conserved archetypal regulatory domain
Source: PubMed Central journal article supplement — Nucleic Acids Res. 2018 Nov 29;47(2):843–54. doi: 10.1093/nar/gky1201 (PMC6344854; doi:10.1093/nar/gky1201), 2018-11-29
Supplement: gky1201_supplemental_files.pdf [file gky1201_supplemental_files.pdf]

## Supplementary Figures

### Supplement Figure 1

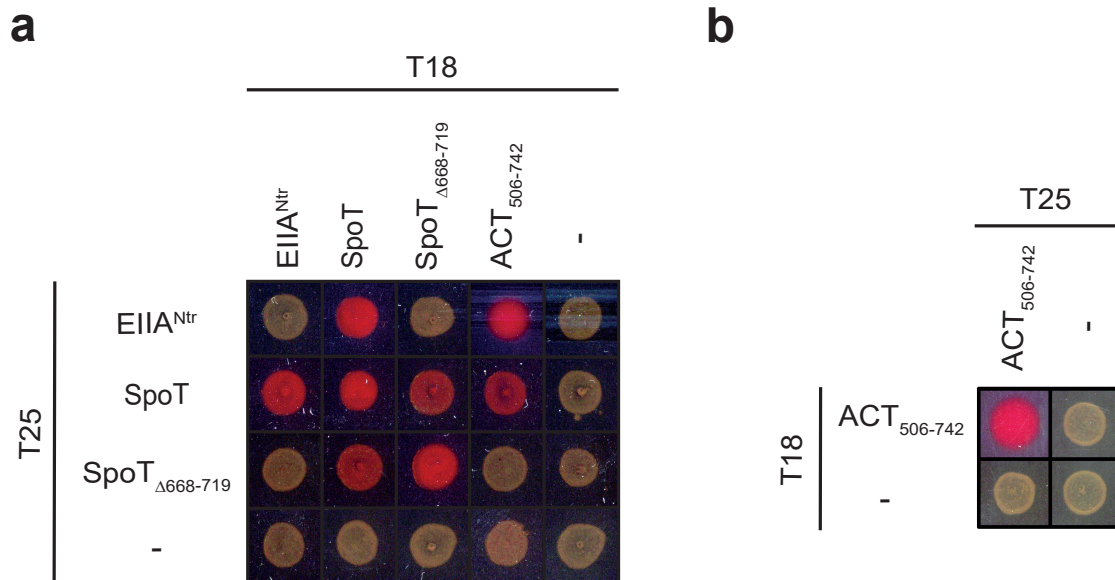

**Supplementary Figure 1** The ACT domain is required for the interaction between SpoT and EIIA<sup>Ntr</sup>~P and interacts with itself in a bacterial two-hybrid assay.

(a) MG1655 *cyaA::frt* (RH785) strains coexpressing T18- fused to *ptsN*, *spoT*, *spoT*<sub>Δ668-719</sub> or *ACT*<sub>506-742</sub> or alone with T25- fused to *ptsN*, *spoT* or *spoT*<sub>Δ668-719</sub> or alone were spotted on MacConkey Agar Base plates supplemented with 1% maltose.

(b) MG1655 *cyaA::frt* (RH785) strains coexpressing T18- fused to *ACT*<sub>506-742</sub> or alone with T25- fused to *ACT*<sub>506-742</sub> or alone were spotted on MacConkey Agar Base plates supplemented with 1% maltose.

Plates were incubated for one day at 30 °C and the red color indicates positive interactions.

## Supplement Figure 2

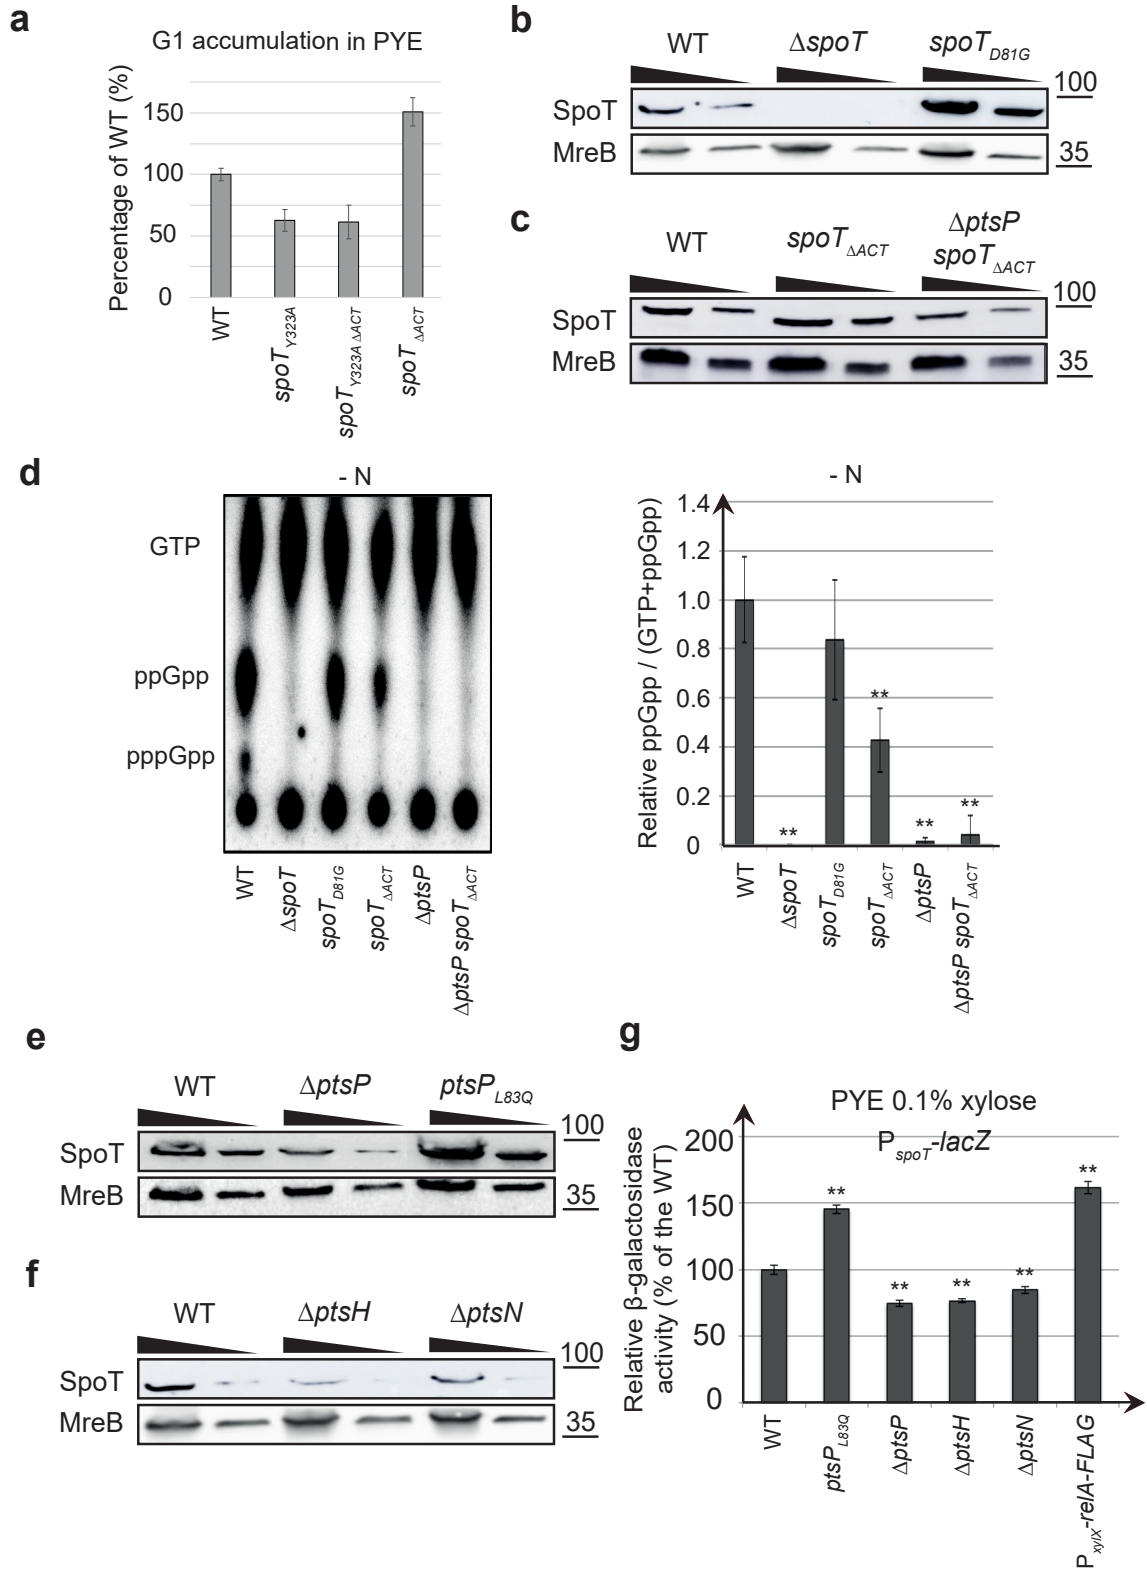

**Supplementary Figure 2** The synthetase activity of a *spoT*<sub>ΔACT</sub> strain is still sensitive to PTS<sup>Ntr</sup>.

(a) Abolishing the synthetase activity of *spoT*<sub>ΔACT</sub> suppresses the extension of G1/swarmer cell lifetime. DNA content was measured in WT (RH50), *spoT*<sub>Y323A</sub> (RH1844), *spoT*<sub>Y323A ΔACT</sub> (RH2491) and *spoT*<sub>ΔACT</sub> (RH1476) strains grown in complex media (PYE) and normalized to the WT (100%). Error bars = SD, n = 3.

(b-c) Abundance of SpoT increased in strains accumulating (p)ppGpp. Immunoblotting of protein samples extracted from WT (RH50), Δ*spoT* (RH1755), *spoT*<sub>D81G</sub> (RH1752), *spoT*<sub>ΔACT</sub> (RH1476), Δ*ptsP spoT*<sub>ΔACT</sub> (RH1478) strains grown in complex media (PYE) to determine the steady-state levels of native SpoT variants and MreB. Two different volumes (15 μL and 5 μL) of protein lysates were loaded for each strain.

(d) The *spoT*<sub>ΔACT</sub> strain is still able to accumulate (p)ppGpp upon nitrogen starvation by a EI<sup>Ntr</sup>-dependent way. The intracellular levels of (p)ppGpp were evaluated by TLC after nucleotides extraction from WT (RH50), Δ*spoT* (RH1755), *spoT*<sub>D81G</sub> (RH1752), *spoT*<sub>ΔACT</sub> (RH1476), Δ*ptsP* (RH1758) and Δ*ptsP spoT*<sub>ΔACT</sub> (RH1478) strains grown for 6 hrs in nitrogen-deplete (-N) conditions.

(e-g) Positive feedback loop of (p)ppGpp on SpoT abundance and *spoT* promoter activity. (e-f) Immunoblotting of protein samples extracted from WT (RH50), Δ*ptsP* (RH1758), *ptsP*<sub>L83Q</sub> (RH1748), Δ*ptsH* (RH1621) and Δ*ptsN* (RH1819) strains grown in complex media (PYE) to determine the steady-state levels of native SpoT and MreB. Two different volumes (15 μL and 5 μL) of protein lysates were loaded for each strain. (g) β-galactosidase assays were performed on WT (RH50), Δ*ptsP* (RH1758), *ptsP*<sub>L83Q</sub> (RH1748), Δ*ptsH* (RH1621), Δ*ptsN* (RH1819) and P<sub>xyIX::relA-FLAG</sub> strains harbouring a P<sub>spoT::lacZ</sub> fusion, grown for 6 hrs in complex media (PYE) supplemented with 0.1% of xylose and normalized to the WT (100%) Error bars = SD, n = 3.

## Supplement Figure 3

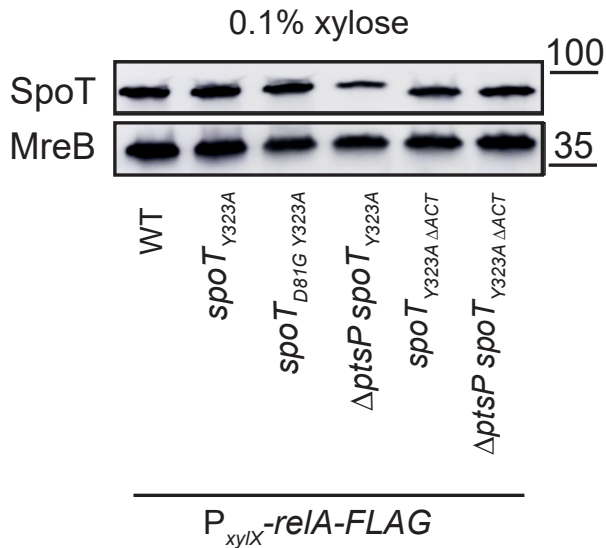

**Supplementary Figure 3** The steady state levels of SpoT variants are similar in strains harbouring  $P_{xylX}::reIA-FLAG$ . Immunoblotting of protein samples extracted from WT (RH50), *spoT*<sub>Y323A</sub> (RH1844), *spoT*<sub>D81G Y323A</sub> (RH2193),  $\Delta$ *ptsP spoT*<sub>Y323A</sub> (RH2196) *spoT*<sub>Y323A  $\Delta$ ACT</sub> (RH1586), and  $\Delta$ *ptsP spoT*<sub>Y323A  $\Delta$ ACT</sub> (RH2492) strains grown for 6 hrs in PYE medium supplemented with 0.1% of xylose to determine the steady-state levels of native SpoT variants and MreB.

## Supplement Figure 4

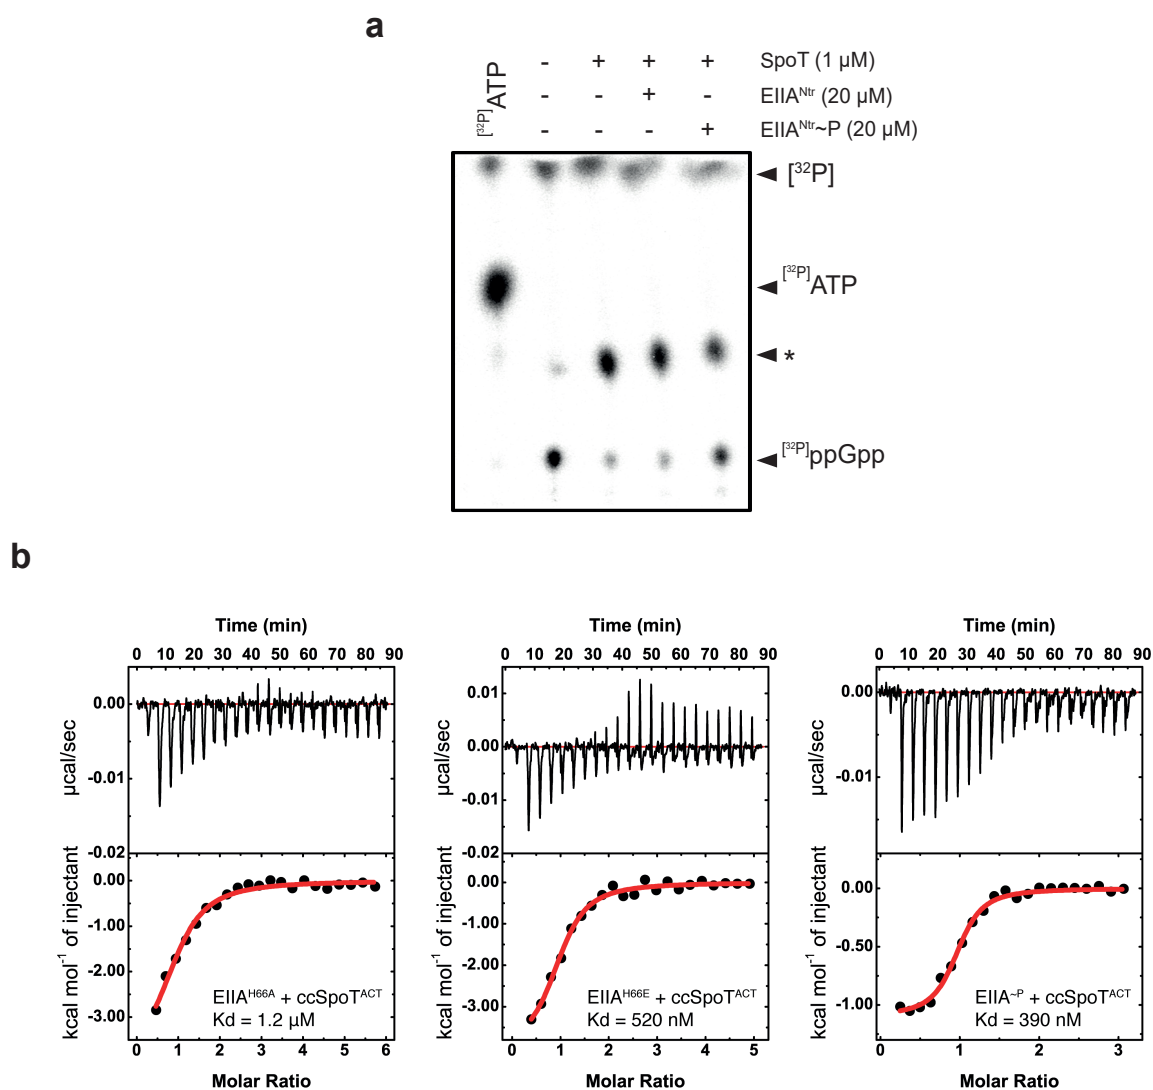

**Supplementary Figure 4** EIIA<sup>Ntr</sup>-P inhibits the hydrolase activity of SpoT *in vitro* and binds ACT.

(a) Phosphorylated EIIA<sup>Ntr</sup> protects ppGpp from hydrolysis by SpoT. Radiolabelled  $[^{32}\text{P}]\text{ppGpp}$  incubated with 1  $\mu\text{M}$  of SpoT in the presence of 20  $\mu\text{M}$  of repurified EIIA<sup>Ntr</sup> or EIIA<sup>Ntr</sup>-P was separated by TLC. The star “\*” indicates a  $[^{32}\text{P}]\text{ppGpp}$  intermediate degradation.  $[^{32}\text{P}]\text{ATP}$  and  $[^{32}\text{P}]\text{ppGpp}$  were used as references.

(b) Phosphorylation of EIIA<sup>Ntr</sup> enhanced interaction with ACT. The  $K_d$  between the ACT domain of SpoT (ccSpoT<sup>ACT</sup>) and the phospho-dead (EIIA<sup>H66A</sup>), the phosphomimetic (EIIA<sup>H66E</sup>) or the phosphorylated (EIIA<sup>-P</sup>) variant of EIIA<sup>Ntr</sup> were calculated by Isothermal Titration Calorimetry (ITC).

## Supplement Figure 5

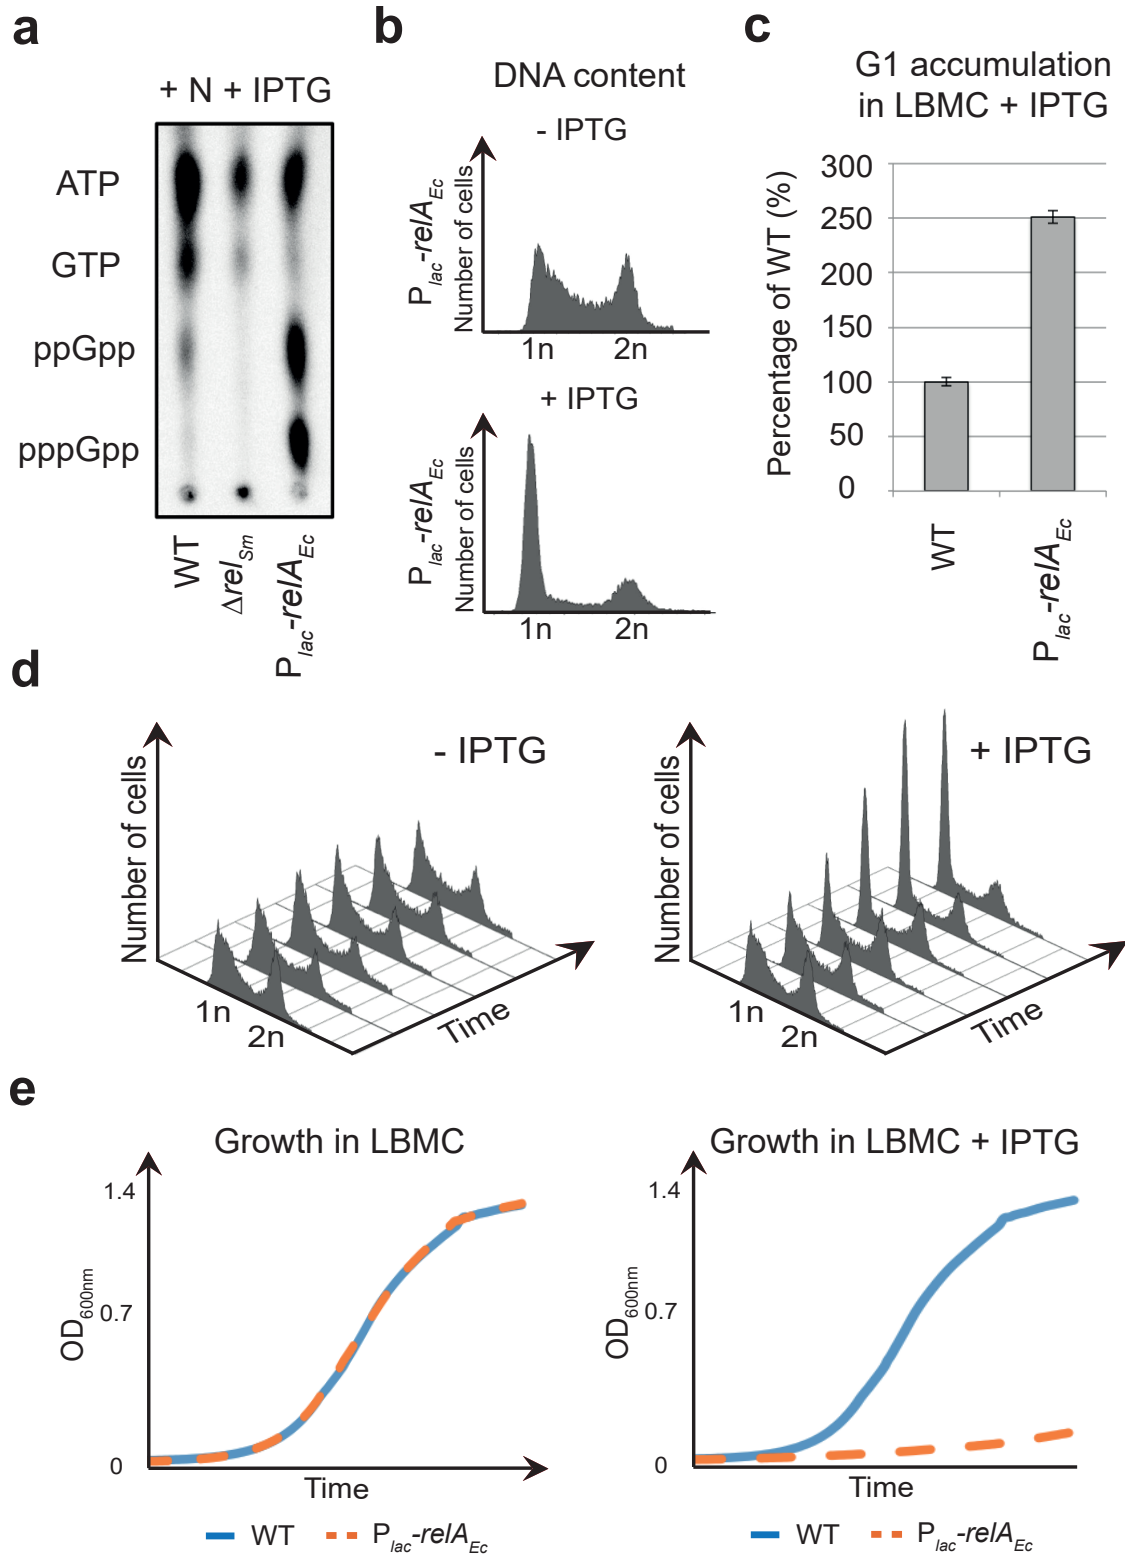

**Supplementary Figure 5** *Sinorhizobium meliloti* accumulates G1 cells upon (p)ppGpp accumulation.

(a) The intracellular levels of (p)ppGpp were evaluated by TLC after nucleotides extraction from WT (RH2000),  $\Delta rel$  (RH2327) and  $P_{lac-rel}A_{Ec}$  strains grown in nitrogen-replete (+N) conditions supplemented with 1 mM IPTG.

(b-c) DNA content (b) and G1 proportion (c) were measured in the same strains grown in complex media (LBMC) with or without 1 mM IPTG for 5 hrs. G1 proportions were normalized to the WT (100%). Error bars = SD, n = 3.

(d) Kinetic of G1 accumulation in cells harbouring  $P_{lac-rel}A_{Ec}$  with or without 1 mM IPTG. The same experiment than in (b) was performed by withdrawing samples every hour for 5 hrs.

(e) Growth of WT with (orange) or without (blue)  $P_{lac-rel}A_{Ec}$  in presence or absence of 1 mM IPTG was measured for 24 hrs.

## Supplement Figure 6

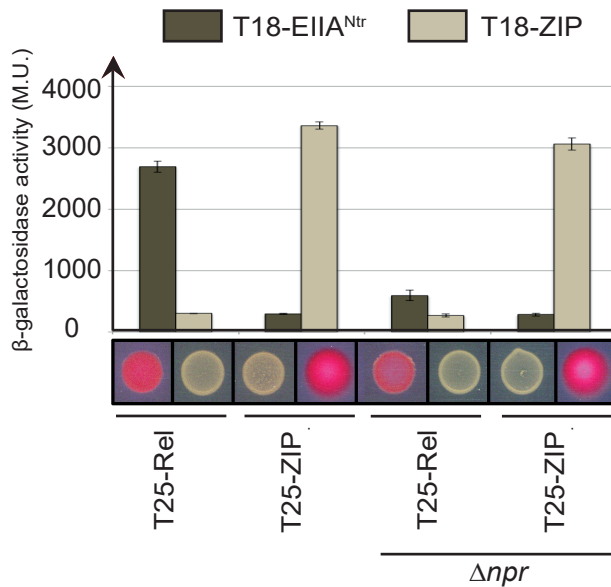

**Supplementary Figure 6** The phosphorylated form of *Rhodobacter sphaeroides* EIIA<sup>Ntr</sup> interacts with Rel in a bacterial two-hybrid assay.

MG1655 *cyaA::frt* (RH785) or (b) MG1655 *cyaA::frt*  $\Delta npr$  (RH2122) strains coexpressing T18- fused to *ptsN<sup>Rs</sup>* or *ZIP* with T25- fused to *rel<sup>Rs</sup>* or *ZIP* were spotted on MacConkey Agar Base plates supplemented with 1% maltose. Plates were incubated for one day at 30 °C. The red color indicates positive interactions. β-galactosidase assays were performed on the same strains. Error bars = SD, n = 3



## Supplementary Tables

### Supplementary Table 1 Oligonucleotides used in this study.

Inserted restriction sites are indicated in capital letter

| Name | Sequence                                              |
|------|-------------------------------------------------------|
| 897  | GGATCCcgctgtcgaaagcttcgagg                            |
| 899  | gcgcgagatccatgaagagc                                  |
| 923  | cgcctaagcggaaacaacggg                                 |
| 926  | ggggcagctgatcgtgttcg                                  |
| 927  | gacgtccacagcaggatgg                                   |
| 933  | cctggtcgaggaacatctcg                                  |
| 978  | tcCATATGacgggcatggctcaaga                             |
| 1159 | cctaagtaactaaCATATGtcatggtctggcggcgcggtggattatcgtcggc |
| 1174 | GAATTCacgcagtcaggtcgtgaaatgc                          |
| 1175 | cctaagtaactaaTCTAGAgttgctgtctggccccgcgctg             |
| 1176 | ggatccccgggtaGAATTCctgaaggagaggtcctcg                 |
| 1178 | ggatccccgggtaGAATTCtaccgctcctcgtcgaaccgg              |
| 1194 | cctaagtaactaaGAATTCgctttgtcagacggcgacg                |
| 1204 | tcGGTACCgaagctgaaggacgtgtcgc                          |
| 1281 | tcAAGCTT acatttcggaagacggctcg                         |
| 1282 | tcGAATTCcggacctgcgaaaggtctc                           |
| 1283 | tcGAATTCcagctcctggtcgatttcgc                          |
| 1284 | tcGGATCCtgctcgcggcgtatctctcg                          |
| 1285 | gcctatccaaggatgaagc                                   |
| 1286 | tcGAATTCcagctcctggtcgatttcgc                          |
| 1287 | tcAAGCTT agactgcatcgacaaggtcg                         |
| 1288 | tcGAATTCctgcatggcgtagacatagg                          |
| 1289 | tcGAATTCcagctcaaggaattgccgag                          |
| 1290 | tcGGATCCaaagacctgcccggccagg                           |

1291 cgcgccatctcttgagtcg  
1292 ctgaattcgcgcacggaatg  
1369 cctaagtaactaaGCTAGCttgtcgtctgtggccccgctgctg  
1370 cctaagtaactaaTCTAGAggaagagttcctgctgctggg  
1435 ggatccccgggtaGAATTCtacctgcctccaggctgagcc  
1439 cctaagtaactaaTCTAGAgatgcgccaatacagagctcg  
1440 ggatccccgggtaGAATTCgaacaggcgccctattcg  
1441 cctaagtaactaaTCTAGAtaaaagattggcattggcaggc  
1442 ggatccccgggtaGAATTCatgctcttccaaccggctcc  
1553 cgtaagtaactaaGGTACCgaaggttccgaaccgcttcg  
1554 ggatccccgggtaAAGCTTcaacgcgcccgattcgggtcc  
1564 ggatccccgggtaGAATTCctagcgtcggaggatgcatagccg  
1608 cctaagtaactaaTCTAGAcatggaactatccaaactctgatgccagg  
1609 ggatccccgggtaGAATTCaggatgtgatgaagaacggggc  
1610 cctaagtaactaaTCTAGAcatgatcgacgtcgaagacctgatcgcc  
1611 ggatccccgggtaGAATTCgccgcttgaagaccacttcc  
1676 cctaagtaactaaGCTAGccacaccatcgactgtccgc  
1818 cctaagtaactaaGCTAGCgagatggtcagctccagcgagc

**Supplementary Table 2** Plasmids used in this study.

| Name   | description                                               | Reference                                              |
|--------|-----------------------------------------------------------|--------------------------------------------------------|
|        | pNPTS138                                                  | M. R. Alley, Imperial College London (UK), unpublished |
|        | pKT25                                                     | 1                                                      |
|        | pUT18C                                                    | 1                                                      |
|        | pKT25- <i>zip</i>                                         | 1                                                      |
|        | pUT18C- <i>zip</i>                                        | 1                                                      |
|        | pCP20                                                     | 2                                                      |
|        | pBAD33                                                    | 3                                                      |
|        | pXTCYC-4- <i>relA-FLAG</i>                                | 4                                                      |
|        | pSRKKm                                                    | 5                                                      |
|        | <i>placZ290-PctrA</i>                                     | 6                                                      |
| pHR639 | pNPTS138- $\Delta$ <i>ptsP</i>                            | 7                                                      |
| pHR689 | pUT18C- <i>spoT</i>                                       | 7                                                      |
| pHR693 | pKT25- <i>ptsN</i>                                        | 7                                                      |
| pHR704 | pUT18C- <i>ptsN</i>                                       | 7                                                      |
| pHR797 | pET-28a- <i>spoT</i>                                      | This study                                             |
| pHR819 | pET-28a- <i>ptsH</i>                                      | This study                                             |
| pHR820 | pET-28a- <i>ptsN</i>                                      | This study                                             |
| pHR821 | pET-28a- <i>ptsN</i> <sub>H66E</sub>                      | This study                                             |
| pHR833 | pET-28a- <i>ptsN</i> <sub>H66A</sub>                      | This study                                             |
| pHR839 | pET-28a- <i>spoT</i> <sub>D81G</sub>                      | This study                                             |
| pHR896 | pSRKKm- <i>relA-FLAG</i>                                  | This study                                             |
| pHR897 | pNPTS138- $\Delta$ <i>ptsP</i> <sup>Sm</sup>              | This study                                             |
| pHR898 | pNPTS138- $\Delta$ <i>rel</i> <sup>Sm</sup>               | This study                                             |
| pHR918 | pKT25- <i>ACT</i> <sub>506-742</sub>                      | This study                                             |
| pHR930 | pET28a- <i>spoT</i> <sub><math>\Delta</math>668-719</sub> | This study                                             |

|         |                                                             |            |
|---------|-------------------------------------------------------------|------------|
| pHR931  | pNPTS138- $\Delta$ ACT                                      | This study |
| pHR935  | pET28a- <i>spoT</i> <sub>633-742</sub>                      | This study |
| pHR939  | pUT18C- <i>ACT</i> <sub>506-742</sub>                       | This study |
| pHR946  | pNPTS138- <i>spoT</i> <sub><math>\Delta</math>668-719</sub> | This study |
| pHR989  | pET28a- <i>spoT</i> <sub>1-373</sub>                        | This study |
| pHR998  | pKT25- <i>re</i> <sup>Sm</sup>                              | This study |
| pHR999  | pKT25- <i>re</i> <sup>Sm</sup> $\Delta$ ACT                 | This study |
| pHR1000 | pKT25- <i>re</i> <sup>Rs</sup>                              | This study |
| pHR1001 | pUT18C- <i>ptsN</i> <sup>Sm</sup>                           | This study |
| pHR1002 | pUT18C- <i>ptsN</i> <sup>Rs</sup>                           | This study |
| pHR1025 | <i>placZ290-PspoT</i>                                       | This study |
| pHR1027 | pET-28a- <i>ptsP</i> <sub>161-754</sub>                     | This study |
| pHR1046 | pKT25- <i>spoT</i> <sub><math>\Delta</math>668-719</sub>    | This study |
| pHR1047 | pUT18C- <i>spoT</i> <sub><math>\Delta</math>668-719</sub>   | This study |

### Supplementary Table 3 Strains used in this study.

| Name   | Description and relevant genotype                                                                                                                                                                                        | Reference         |
|--------|--------------------------------------------------------------------------------------------------------------------------------------------------------------------------------------------------------------------------|-------------------|
| RH10   | S17-1 ((F- $\lambda$ - 13 <i>endA thi pro recA hsdR2</i> (r-m+) RP4-2-Tet::Mu-Km ::Tn7)                                                                                                                                  | 8                 |
| RH319  | MT607( <i>pro-82 thi-I hsdR17</i> (r-m+) <i>supE44 recA56</i> )                                                                                                                                                          | 9                 |
| RH603  | BL21 (DE3)<br>Top10                                                                                                                                                                                                      | Novagen           |
| RH783  | ( $\phi$ 80 <i>lacZ</i> $\Delta$ M15 <i>araD139</i> $\Delta$ ( <i>ara-leu</i> )7697 <i>galE15 galK16</i> $\Delta$ ( <i>lac</i> )X74 <i>rpsL</i> (StrR) <i>nupG recA1 endA1 mcrA</i> $\Delta$ ( <i>mrr-hsdRMS-mcrBC</i> ) | Life Technologies |
| RH785  | MG1655 <i>cya::frt</i>                                                                                                                                                                                                   | 10                |
| RH2122 | MG1655 <i>cya::frt</i> $\Delta$ <i>npr</i>                                                                                                                                                                               | 7                 |
| RH2292 | NM522 pQE-30- <i>ptsI_Bs</i>                                                                                                                                                                                             | 11                |
| RH50   | <i>C. crescentus</i> NA1000                                                                                                                                                                                              | 12                |
| RH1476 | NA1000 <i>spoT</i> $\Delta$ <i>ACT</i>                                                                                                                                                                                   | This study        |
| RH1478 | NA1000 $\Delta$ <i>ptsP spoT</i> $\Delta$ <i>ACT</i>                                                                                                                                                                     | This study        |
| RH1586 | NA1000 <i>spoT</i> <sub>Y323A</sub> $\Delta$ <i>ACT</i>                                                                                                                                                                  | This study        |
| RH1621 | NA1000 $\Delta$ <i>ptsH</i>                                                                                                                                                                                              | 7                 |
| RH1748 | NA1000 <i>ptsP</i> <sub>L83Q</sub>                                                                                                                                                                                       | 7                 |
| RH1752 | NA1000 <i>spoT</i> <sub>D81G</sub>                                                                                                                                                                                       | 7                 |
| RH1755 | NA1000 $\Delta$ <i>spoT</i>                                                                                                                                                                                              | 7                 |
| RH1758 | NA1000 $\Delta$ <i>ptsP</i>                                                                                                                                                                                              | 7                 |
| RH1819 | NA1000 $\Delta$ <i>ptsN</i>                                                                                                                                                                                              | 7                 |
| RH1844 | NA1000 <i>spoT</i> <sub>Y323A</sub>                                                                                                                                                                                      | 7                 |
| RH1882 | NA1000 $\Delta$ <i>spoT</i>                                                                                                                                                                                              | 13                |
| RH2017 | NA1000 <i>ptsN</i> <sub>H66E</sub>                                                                                                                                                                                       | 7                 |
| RH2018 | NA1000 <i>ptsN</i> <sub>H66A</sub>                                                                                                                                                                                       | 7                 |
| RH2193 | NA1000 <i>spoT</i> <sub>D81G Y323A</sub>                                                                                                                                                                                 | 7                 |
| RH2196 | NA1000 $\Delta$ <i>ptsP spoT</i> <sub>Y323A</sub>                                                                                                                                                                        | 7                 |

|        |                                              |            |
|--------|----------------------------------------------|------------|
| RH2142 | NA1000 $\Delta spoT_{\Delta ACT}$            | 13         |
| RH2447 | NA1000 $\Delta ptsP spoT_{\Delta 668-719}$   | This study |
| RH2491 | NA1000 $\Delta ptsP spoT_{\Delta ACT}$       | This study |
| RH2492 | NA1000 $\Delta ptsP spoT_{Y323A \Delta ACT}$ | This study |
| RH2000 | <i>S. meliloti</i> Rm1021                    | 14         |
| RH2326 | Sm1021 $\Delta ptsP$                         | This study |
| RH2327 | Sm1021 $\Delta rel$                          | This study |
| RH2278 | <i>R. sphaeroides</i> 2.4.1                  | 15         |

## Supplementary Methods

### Plasmids construction

#### **pHR797** (pET-28a-*spoT*)

*C. crescentus* *CCNA\_01622* was amplified from NA1000 gDNA by PCR with primers 1369 and 1176, digested with *Nhe* I and *Eco* RI and ligated into the pET-28a vector cut with the same restriction enzymes.

#### **pHR819** (pET-28a-*ptsH*)

*C. crescentus* *CCNA\_00241* was amplified from NA1000 gDNA by PCR with primers 978 and 1178, digested with *Nde* I and *Eco* RI and ligated into the pET-28a vector cut with the same restriction enzymes.

#### **pHR820** (pET-28a-*ptsN*)

*C. crescentus* *CCNA\_00241* was amplified from NA1000 gDNA by PCR with primers 1159 and 1174, digested with *Nde* I and *Eco* RI and ligated into the pET-28a vector cut with the same restriction enzymes.

#### **pHR821** (pET-28a-*ptsN<sub>H66E</sub>*)

*C. crescentus* *CCNA\_00241* was amplified from NA1000 *ptsN<sub>H66E</sub>* (RH2017) gDNA by PCR with primers 1159 and 1174, digested with *Nde* I and *Eco* RI and ligated into the pET-28a vector cut with the same restriction enzymes.

#### **pHR833** (pET-28a-*ptsN<sub>H66A</sub>*)

*C. crescentus* *CCNA\_00241* was amplified from NA1000 *ptsN<sub>H66A</sub>* (RH2018) gDNA by PCR with primers 1159 and 1174, digested with *Nde* I and *Eco* RI and ligated into the pET-28a vector cut with the same restriction enzymes.

#### **pHR839** (pET-28a-*spoT<sub>D81G</sub>*)

*C. crescentus* *CCNA\_01622* was amplified from NA1000 *spoT<sub>D81G</sub>* (RH1752) gDNA by PCR with primers 1369 and 1176, digested with *Nde* I and *Eco* RI and ligated into the pET-28a vector cut with the same restriction enzymes.

#### **pHR896** (pSRKKm-*relA-FLAG*)

*relA-FLAG* was cut off from pXTCYC-4-*relA-FLAG* with *Nde* I and *Nhe* I and ligated into the pSRKKm vector cut with the same restriction enzymes.

#### **pHR897** (pNPTS138- $\Delta$ *ptsP<sup>Sm</sup>*)

Upstream and downstream regions of *S. meliloti* *smc02437* were amplified from RM1021 gDNA by PCR respectively with primers 1281/1282 and 1283/1284,

digested respectively with *Hind* III/*Eco* RI and *Eco* RI/ *Bam* HI; and ligated into the pNPTS138 vector cut with *Hind* III and *Bam* HI.

**pHR898** (pNPTS138- $\Delta$ *rel*<sup>Sm</sup>)

Upstream and downstream regions of *S. meliloti smc02659* were amplified from RM1021 gDNA by PCR respectively with primers 1287/1289 and 1289/1290, digested respectively with *Hind* III/*Eco* RI and *Eco* RI/ *Bam* HI; and ligated into the pNPTS138 vector cut with *Hind* III and *Bam* HI.

**pHR918** (pKT25-*ACT*<sub>506-742</sub>)

*C. crescentus ACT*<sub>506-742</sub> was amplified from NA1000 gDNA by PCR with primers 1370 and 1176, digested with *Xba* I and *Eco* RI and ligated into the pKT25 vector cut with the same restriction enzymes.

**pHR930** (pET-28a-*spoT* $\Delta$ <sub>668-719</sub>)

*C. crescentus spoT* $\Delta$ <sub>668-719</sub> was amplified from NA1000 *spoT* $\Delta$ <sub>668-719</sub> (RH2447) gDNA by PCR with primers 1369 and 1176, digested with *Nhe* I and *Eco* RI and ligated into the pET-28a vector cut with the same restriction enzymes.

**pHR931** (pNPTS138- $\Delta$ *ACT*)

*C. crescentus spoT* $\Delta$ *ACT* was amplified from NA1000 *HA-spoT* $\Delta$ *ACT* (RH2142) gDNA by PCR with primers 1370 and 899 and ligated into the pNPTS138 vector cut with the *Eco* RV.

**pHR935** (pET-28a-*spoT*<sub>633-742</sub>)

*C. crescentus spoT*<sub>633-742</sub> (encoding the ACT domain of SpoT) was amplified from NA1000 (RH50) gDNA by PCR with primers 1676 and 1176, digested with *Nhe* I and *Eco* RI and ligated into the pET-28a vector cut with the same restriction enzymes.

**pHR939** (pUT18c-*ACT*<sub>506-742</sub>)

*C. crescentus ACT*<sub>506-742</sub> was amplified from NA1000 gDNA by PCR with primers 1370 and 1176, digested with *Xba* I and *Eco* RI and ligated into the pUT18c vector cut with the same restriction enzymes.

**pHR946** (pNPTS138-*spoT* $\Delta$ <sub>668-719</sub>)

DNA fragment of *C. crescentus CCNA\_01622* encompassing deletion of the ACT domain from aa 668 to 719 was synthesized as a gBlock (IDT) and cloned into pNPTS138 cut with *Eco* RV.



**pHR989** (pET-28a-*spoT*<sub>1-373</sub>)

*C. crescentus spoT*<sub>1-373</sub> was amplified from NA1000 (RH50) gDNA by PCR with primers 1369 and 1435, digested with *Nhe* I and *Eco* RI and ligated into the pET-28a vector cut with the same restriction enzymes.

**pHR998** (pKT25-*rel*<sup>Sm</sup>)

*S. meliloti smc02659* was amplified from RM1021 gDNA by PCR with primers 1439 and 1440, digested with *Xba* I and *Eco* RI and ligated into the pKT25 vector cut with the same restriction enzymes.

**pHR999** (pKT25-*rel*<sup>Sm</sup> $\Delta$ ACT)

*S. meliloti rel*<sup>Sm</sup> $\Delta$ ACT was amplified from RM1021 *rel* $\Delta$ ACT (RH2327) gDNA by PCR with primers 1439 and 1564, digested with *Xba* I and *Eco* RI and ligated into the pKT25 vector cut with the same restriction enzymes.

**pHR1000** (pKT25-*rel*<sup>Rs</sup>)

*R. sphaeroides* RSP1670 was amplified from *R. sphaeroides* 2.4.1 gDNA by PCR with primers 1610 and 1611, digested with *Xba* I and *Eco* RI and ligated into the pKT25 vector cut with the same restriction enzymes.

**pHR1001** (pUT18c-*ptsN*<sup>Sm</sup>)

*S. meliloti smc01141* was amplified from RM1021 gDNA by PCR with primers 1441 and 1442, digested with *Xba* I and *Eco* RI and ligated into the pUT18c vector cut with the same restriction enzymes.

**pHR1002** (pUT18c-*ptsN*<sup>Rs</sup>)

*R. sphaeroides* RSP1158 was amplified from *R. sphaeroides* 2.4.1 gDNA by PCR with primers 1608 and 1609, digested with *Xba* I and *Eco* RI and ligated into the pUT18c vector cut with the same restriction enzymes.

**pHR1025** (*placZ290-PspoT*)

*C. crescentus PspoT* was amplified from NA1000 gDNA by PCR with primers 1553 and 1554, digested with *Kpn* I and *Hind* III and ligated into the *placZ290-PctrA* vector cut with the same restriction enzymes.

**pHR1027** (pET-28a-*ptsP*<sub>161-754</sub>)

*C. crescentus ptsP*<sub>161-754</sub> (encoding E<sup>Ntr</sup> $\Delta$ GAF) was amplified from NA1000 (RH50) gDNA by PCR with primers 1818 and 1194, digested with *Nhe* I and *Eco* RI and ligated into the pET-28a vector cut with the same restriction enzymes.

**pHR1046** (pKT25-*spoT*<sub>Δ668-719</sub>)

*C. crescentus spoT*<sub>Δ668-719</sub> was amplified from NA1000 *spoT*<sub>Δ668-719</sub> (RH2447) gDNA by PCR with primers 1175 and 1176, digested with *Xba* I and *Eco* RI and ligated into the pKT25 vector cut with the same restriction enzymes.

**pHR1047** (pUT18c-*spoT*<sub>Δ668-719</sub>)

*C. crescentus spoT*<sub>Δ668-719</sub> was amplified from NA1000 *spoT*<sub>Δ668-719</sub> (RH2447) gDNA by PCR with primers 1175 and 1176, digested with *Xba* I and *Eco* RI and ligated into the pUT18c vector cut with the same restriction enzymes.

### **Description of Strains**

**RH1476** (NA1000 *spoT*<sub>ΔACT</sub>)

Triparental mating between NA1000, RH319 (MT607-pRK600) and RH2378 (Top10-pNPTS138 *spoT*<sub>ΔACT</sub>) was selected on PYE Nal Kan, streaked on PYE Kan, cultivated o/n in PYE and plated on PYE 3% Suc. Suc<sup>R</sup> candidates were streaked on PYE Kan and PYE. Kan<sup>S</sup> colonies were screened by PCR with primers 1204/897.

**RH1478** (NA1000 Δ*ptsP spoT*<sub>ΔACT</sub>)

Triparental mating between RH1758 (NA1000 Δ*ptsP*), RH319 (MT607-pRK600) and RH2378 (Top10-pNPTS138 *spoT*<sub>ΔACT</sub>) was selected on PYE Nal Kan, streaked on PYE Kan, cultivated o/n in PYE and plated on PYE 3% Suc. Suc<sup>R</sup> candidates were streaked on PYE Kan and PYE. Kan<sup>S</sup> colonies were screened by PCR with primers 1204/897.

**RH1586** (NA1000 *spoT*<sub>Y323A ΔACT</sub>)

Triparental mating between RH1844 (NA1000 *spoT*<sub>Y323A</sub>), RH319 (MT607-pRK600) and RH2378 (Top10-pNPTS138-*spoT*<sub>ΔACT</sub>) was selected on PYE Nal Kan, streaked on PYE Kan, cultivated o/n in PYE and plated on PYE 3% Suc. Suc<sup>R</sup> candidates were streaked on PYE Kan and PYE. Kan<sup>S</sup> colonies were screened by PCR with primers 923/933 and 1175/1176.

**RH2447** (NA1000 Δ*ptsP spoT*<sub>Δ668-719</sub>)

Triparental mating between RH1758 (NA1000 Δ*ptsP*), RH319 (MT607-pRK600) and RH2403 (Top10-pNPTS138 *spoT*<sub>Δ668-719</sub>) was selected on PYE Nal Kan, streaked on PYE Kan, cultivated o/n in PYE and plated on PYE 3% Suc. Suc<sup>R</sup> candidates were

streaked on PYE Kan and PYE. Kan<sup>S</sup> colonies were screened by PCR with primers 1204/897.

**RH2491** (NA1000  $\Delta ptsP$  HA-*spoT* $\Delta ACT$ )

Triparental mating between RH2142 (NA1000 HA-*spoT* $\Delta ACT$ ), RH319 (MT607-pRK600) and RH1757 (Top10-pNPTS138- $\Delta ptsP$ ) was selected on PYE Nal Kan, streaked on PYE Kan, cultivated o/n in PYE and plated on PYE 3% Suc. Suc<sup>R</sup> candidates were streaked on PYE Kan and PYE. Kan<sup>S</sup> colonies were screened by PCR with primers 926/927.

**RH2492** (NA1000  $\Delta ptsP$  HA-*spoT*<sub>Y323A</sub>  $\Delta ACT$ )

Triparental mating between RH2491 (NA1000  $\Delta ptsP$  HA-*spoT*<sub>Y323A</sub>  $\Delta ACT$ ), RH319 (MT607-pRK600) and RH1817 (Top10-pNPTS138-*spoT*<sub>Y323A</sub>) was selected on PYE Nal Kan, streaked on PYE Kan, cultivated o/n in PYE and plated on PYE 3% Suc. Suc<sup>R</sup> candidates were streaked on PYE Kan and PYE. Kan<sup>S</sup> colonies were screened by PCR with primers 923/933 and 1175/1176.

**RH2326** (RM1021  $\Delta ptsP$ )

Triparental mating between RH2000 (RM1021), RH319 (MT607-pRK600) and RH2323 (Top10-pNPTS138- $\Delta smc02437$ ) was selected on PYE Nal Kan, streaked on PYE Kan, cultivated o/n in PYE and plated on PYE 3% Suc. Suc<sup>R</sup> candidates were streaked on PYE Kan and PYE. Kan<sup>S</sup> colonies were screened by PCR with primers 1285/1286.

**RH2327** (RM1021  $\Delta rel$ )

Triparental mating between RH2000 (RM1021), RH319 (MT607-pRK600) and RH2323 (Top10-pNPTS138- $\Delta smc02659$ ) was selected on PYE Nal Kan, streaked on PYE Kan, cultivated o/n in PYE and plated on PYE 3% Suc. Suc<sup>R</sup> candidates were streaked on PYE Kan and PYE. Kan<sup>S</sup> colonies were screened by PCR with primers 1291/1292.

## Supplementary References

1. Karimova G, Pidoux J, Ullmann A, Ladant D. A bacterial two-hybrid system based on a reconstituted signal transduction pathway. *Proc Natl Acad Sci U S A* **95**, 5752-5756 (1998).
2. Cherepanov PP, Wackernagel W. Gene disruption in Escherichia coli: TcR and KmR cassettes with the option of Flp-catalyzed excision of the antibiotic-resistance determinant. *Gene* **158**, 9-14 (1995).
3. Guzman LM, Belin D, Carson MJ, Beckwith J. Tight regulation, modulation, and high-level expression by vectors containing the arabinose PBAD promoter. *J Bacteriol* **177**, 4121-4130 (1995).
4. Gonzalez D, Collier J. Effects of (p)ppGpp on the progression of the cell cycle of *Caulobacter crescentus*. *J Bacteriol* **196**, 2514-2525 (2014).
5. Khan SR, Gaines J, Roop RM, 2nd, Farrand SK. Broad-host-range expression vectors with tightly regulated promoters and their use to examine the influence of TraR and TraM expression on Ti plasmid quorum sensing. *Appl Environ Microbiol* **74**, 5053-5062 (2008).
6. Fumeaux C, *et al.* Cell cycle transition from S-phase to G1 in *Caulobacter* is mediated by ancestral virulence regulators. *Nat Commun* **5**, 4081 (2014).
7. Ronneau S, Petit K, De Bolle X, Hallez R. Phosphotransferase-dependent accumulation of (p)ppGpp in response to glutamine deprivation in *Caulobacter crescentus*. *Nat Commun* **7**, 11423 (2016).
8. Simon R, Priefer U, Pühler A. A Broad Host Range Mobilization System for In Vivo Genetic Engineering: Transposon Mutagenesis in Gram Negative Bacteria. *Bio/Technology* **1**, 784 (1983).
9. Casadaban MJ, Cohen SN. Analysis of gene control signals by DNA fusion and cloning in *Escherichia coli*. *J Mol Biol* **138**, 179-207 (1980).
10. Abel S, *et al.* Regulatory cohesion of cell cycle and cell differentiation through interlinked phosphorylation and second messenger networks. *Mol Cell* **43**, 550-560 (2011).
11. Galinier A, *et al.* The *Bacillus subtilis* *crh* gene encodes a HPr-like protein involved in carbon catabolite repression. *Proc Natl Acad Sci U S A* **94**, 8439-8444 (1997).
12. Marks ME, *et al.* The genetic basis of laboratory adaptation in *Caulobacter crescentus*. *J Bacteriol* **192**, 3678-3688 (2010).
13. Boutte CC, Crosson S. The complex logic of stringent response regulation in *Caulobacter crescentus*: starvation signalling in an oligotrophic environment. *Mol Microbiol* **80**, 695-714 (2011).
14. Galibert F, *et al.* The composite genome of the legume symbiont *Sinorhizobium meliloti*. *Science* **293**, 668-672 (2001).
15. Choudhary M, Zanhua X, Fu YX, Kaplan S. Genome analyses of three strains of *Rhodobacter sphaeroides*: evidence of rapid evolution of chromosome II. *J Bacteriol* **189**, 1914-1921 (2007).
